# Supplementary material for: Enhanced host–guest interaction between [10]cycloparaphenylene ([10]CPP) and [5]CPP by cationic charges
Source: publisher site journal article supplement (doi:10.3762/bjoc.20.38), 2024-02-23
Supplement: Additional file 1 [file 1860-5397-20-38-S1.pdf]

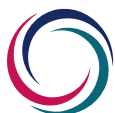

## Supporting Information

for

### Enhanced host–guest interaction between [10]cycloparaphenylene ([10]CPP) and [5]CPP by cationic charges

Eiichi Kayahara, Yoshiyuki Mizuhata and Shigeru Yamago

*Beilstein J. Org. Chem.* **2024**, *20*, 436–444. [doi:10.3762/bjoc.20.38](https://doi.org/10.3762/bjoc.20.38)

## Experimental procedures and computation data

**General.**  $^1\text{H}$  NMR (400 MHz) experiments were carried out in anhydrous conditions under nitrogen atmosphere for  $\text{CD}_2\text{Cl}_2$  or 1,1,2,2-tetrachloroethane- $d_2$  (TCE- $d_2$ ) solution of a sample and are reported in parts per million ( $\delta$ ) from residual solvent peak. UV–vis–NIR spectra were measured in  $\text{CH}_2\text{Cl}_2$  at room temperature. Cyclic voltammetry was conducted with a Pt electrode for 1,2-dichloroethane of a sample (1 mmol/L) in the presence of supporting electrolyte,  $\text{Bu}_4\text{NB}(\text{C}_6\text{F}_5)_4$  (0.1 mol/L) at room temperature under nitrogen atmosphere. Scan rates of 100 mV/s were employed. The potentials were calibrated with respect to the ferrocene/ferrocenium couple ( $\text{Fc}/\text{Fc}^+$ ).

**Materials.**  $[n]\text{CPPs}$  ( $n = 5, 8-12$ ),  $[1][5]\text{CPP}^{2+} [\text{B}(\text{C}_6\text{F}_5)_4]_2$ ,  $[2][10]\text{CPP}^{2+} (\text{SbF}_6)_2$ ,  $[2][5]\text{CPP}^{2+} \text{SbCl}_6$ ,  $[2]$  and  $[10]\text{CPP}^{2+} \text{SbCl}_6$   $[2]$  were prepared according to literature procedures.  $\text{CD}_2\text{Cl}_2$  or 1,1,2,2-tetrachloroethane- $d_2$  (TCE- $d_2$ ) was used after dried over molecular sieves.

### 1. Experimental procedures of titration experiment

A solution of  $[5]\text{CPP}^{2+}$  TCE- $d_2$  ( $1.63 \times 10^{-2} \text{ mol L}^{-1}$ ) was added to a solution of  $[10]\text{CPP}^{2+}$  in TCE- $d_2$  ( $1.30 \times 10^{-4} \text{ mol L}^{-1}$ ) at 50 °C. The changes in the chemical shift ( $\Delta\delta_{\text{obs}}$ ) of  $[10]\text{CPP}$  were monitored as a function of the added ( $[5]\text{CPP}^{2+}$ ), and the  $\Delta\delta_{\text{obs}}$  and  $[5]\text{CPP}^{2+}$  were fitted by non-linear curve fitting with least squares method by using eq. 1 to obtain association constant  $K_a$ .

$$\Delta\delta_{\text{obs}} = \frac{K_a \Delta\delta_{\text{CP}} [\text{G}]}{1 + K_a [\text{G}]}$$

$\Delta\delta_{\text{obs}}$ : the change in the chemical shift from free  $[10]\text{CPP}$

$\Delta\delta_{\text{cp}}$ :  $\Delta\delta_{\text{obs}}$  at 100% complexation

$[\text{G}]$ : concentration of  $[5]\text{CPP}^{2+}$

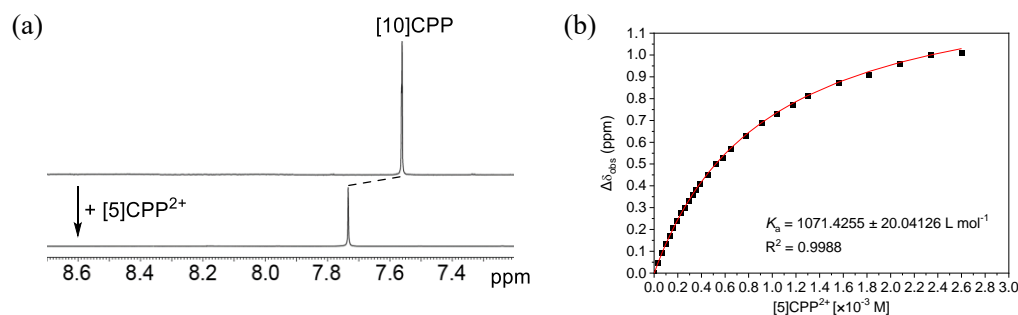

**Figure S1.** Titration experiments for  $[5]\text{CPP}$ . (a)  $^1\text{H}$  NMR spectra of a 1:1 mixture of  $[5]\text{CPP}^{2+}$  and  $[10]\text{CPP}$  in TCE- $d_2$  at 25 °C, and (b) determination of  $K_a$  for  $[10]\text{CPP} \rightleftharpoons [5]\text{CPP}^{2+}$  by the least-square method in TCE- $d_2$  at 50 °C.

## 2. Theoretical calculations

DFT calculations were carried using Gaussian 16, Revision A.03 [3]. Geometry optimizations were performed with standard gradient techniques at  $\omega$ B97X-D levels of theory with the 6-31G\* basis set. All stationary points were optimized without any symmetry assumptions and characterized by normal coordinate analysis at the same level of theory.

**Table S1.** Energies ( $E$ ), zero-point correction ( $ZPE$ ), thermal correction to enthalpy ( $H$ ) at 298.15 K, thermal correction to Gibbs free energy at 298.15 K and entropy ( $S$ ) at 298.15 K under 1 atmosphere of pressure of the structures calculated at the (U)B3LYP/6-31G\* level of theory.

| Molecular                                      | $E$<br>(kJ mol <sup>-1</sup> ) | $ZPE$<br>(kJ mol <sup>-1</sup> ) | $E + ZPE$<br>(kJ mol <sup>-1</sup> ) | $H$<br>(kJ mol <sup>-1</sup> ) | $G$<br>(kJ mol <sup>-1</sup> ) | $S$<br>(cal mol <sup>-1</sup> K <sup>-1</sup> ) |
|------------------------------------------------|--------------------------------|----------------------------------|--------------------------------------|--------------------------------|--------------------------------|-------------------------------------------------|
| [5]CPP <sup>2+</sup>                           | -3030185.76                    | 1066.709144                      | -3029119.05                          | -3029061.65                    | -3029245.60                    | 147.461                                         |
| [10]CPP                                        | -6064134.93                    | 2148.803718                      | -6061986.12                          | -6061869.27                    | -6062188.33                    | 255.773                                         |
| [10]CPP $\Rightarrow$ [5]CPP <sup>2+</sup> (1) | -9094628.84                    | 3223.40249                       | -9091405.44                          | -9091231.27                    | -9091656.36                    | 340.76                                          |
| [10]CPP $\Rightarrow$ [5]CPP <sup>2+</sup> (2) | -9094626.31                    | 3226.2144                        | -9091400.09                          | -9091226.76                    | -9091647.59                    | 337.35                                          |
| [10]CPP $\Rightarrow$ [5]CPP <sup>2+</sup> (3) | -9094624.61                    | 3226.251157                      | -9091398.36                          | -9091224.48                    | -9091651.23                    | 337.35                                          |

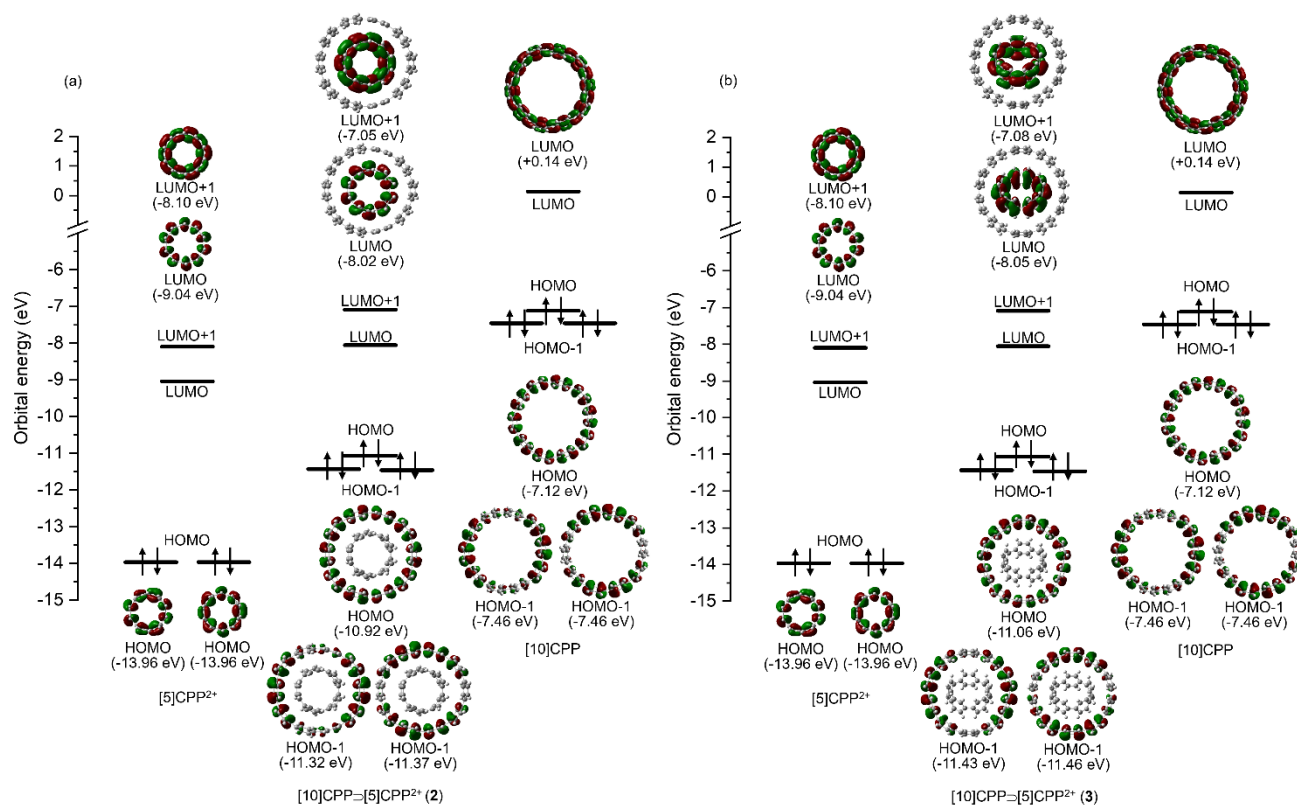

**Figure S2.** HOMO-1, HOMO, LUMO, and LUMO+1 orbitals of (a) [10]CPP $\Rightarrow$ [5]CPP<sup>2+</sup> (2), (b) [10]CPP $\Rightarrow$ [5]CPP<sup>2+</sup> (3), [5]CPP<sup>2+</sup>, and [10]CPP.

**Table S2.** TD-DFT vertical one-electron excitations calculated at the  $\omega$ B97X-D/6-31G\* level.

| Molecule                                   | Energy (eV) | Wavelength (nm) | Oscillator Strength ( <i>f</i> ) | Description                             |
|--------------------------------------------|-------------|-----------------|----------------------------------|-----------------------------------------|
| [10]CPP $\supset$ [5]CPP <sup>2+</sup> (1) | 0.6437      | 1926.10         | 0.0001                           | HOMO $\rightarrow$ LUMO (0.70157)       |
|                                            | 1.0255      | 1208.99         | 0.0043                           | d-HOMO-1 $\rightarrow$ LUMO (0.69947)   |
|                                            | 1.0265      | 1207.88         | 0.0043                           | d-HOMO-1 $\rightarrow$ LUMO (0.69104)   |
|                                            | 1.7968      | 690.04          | 0.0547                           | d-HOMO-3 $\rightarrow$ LUMO (0.42875)   |
|                                            | 1.7971      | 689.90          | 0.0545                           | d-HOMO-3 $\rightarrow$ LUMO (0.42982)   |
|                                            | 3.0933      | 400.81          | 0.4447                           | d-HOMO-3 $\rightarrow$ LUMO+1 (0.51169) |
|                                            | 3.0942      | 400.70          | 0.4443                           | d-HOMO-3 $\rightarrow$ LUMO+1 (0.51120) |
| [10]CPP $\supset$ [5]CPP <sup>2+</sup> (2) | 0.6809      | 1820.83         | 0.0001                           | HOMO $\rightarrow$ LUMO (0.69949)       |
|                                            | 1.0449      | 1186.61         | 0.0010                           | d-HOMO-1 $\rightarrow$ LUMO (0.69828)   |
|                                            | 1.1541      | 1074.27         | 0.0043                           | d-HOMO-1 $\rightarrow$ LUMO (0.0159)    |
|                                            | 1.7941      | 691.07          | 0.0820                           | d-HOMO-3 $\rightarrow$ LUMO (0.47820)   |
|                                            | 1.8130      | 683.87          | 0.0612                           | d-HOMO-3 $\rightarrow$ LUMO (0.53596)   |
|                                            | 3.1295      | 398.74          | 0.2627                           | d-HOMO-3 $\rightarrow$ LUMO+1 (0.46832) |
|                                            | 3.2170      | 396.18          | 0.2627                           | d-HOMO-3 $\rightarrow$ LUMO+1 (0.46832) |
| [10]CPP $\supset$ [5]CPP <sup>2+</sup> (3) | 0.8676      | 1428.98         | 0.0027                           | HOMO $\rightarrow$ LUMO (0.70057)       |
|                                            | 1.1812      | 1049.60         | 0.0007                           | d-HOMO-1 $\rightarrow$ LUMO (0.69678)   |
|                                            | 1.7951      | 690.69          | 0.0125                           | HOMO $\rightarrow$ LUMO+1 (0.66245)     |
|                                            | 1.8204      | 681.09          | 0.0869                           | d-HOMO-3 $\rightarrow$ LUMO (0.47820)   |
|                                            | 3.1764      | 390.33          | 0.2492                           | d-HOMO-3 $\rightarrow$ LUMO+1 (0.43617) |
|                                            | 3.2853      | 377.39          | 0.2944                           | d-HOMO-3 $\rightarrow$ LUMO+1 (0.43429) |

**Table S3.** Averaged C–C bond lengths (Å), dihedral angles (deg), and Mullikene charge for the optimized structures of [5]CPP<sup>2+</sup>, [10]CPP, and [5] and [10]CPP unit in the complex [10]CPP $\supset$ [5]CPP<sup>2+</sup>.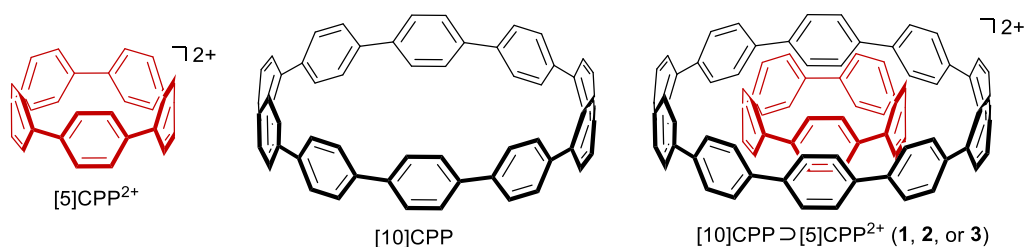

| Molecule                                                                                                      | <i>C</i> <sub>ipso</sub> - <i>C</i> <sub>ipso</sub> (Å) | <i>C</i> <sub>ipso</sub> - <i>C</i> <sub>ortho</sub> (Å) | <i>C</i> <sub>ortho</sub> - <i>C</i> <sub>ortho</sub> (Å) | <i>C</i> <sub>ortho</sub> - <i>C</i> <sub>ipso</sub> - <i>C</i> <sub>ipso</sub> - <i>C</i> <sub>ortho</sub> (°) | Mulliken Charge |
|---------------------------------------------------------------------------------------------------------------|---------------------------------------------------------|----------------------------------------------------------|-----------------------------------------------------------|-----------------------------------------------------------------------------------------------------------------|-----------------|
| [10]CPP $\supset$ [5]CPP <sup>2+</sup> (1)                                                                    |                                                         |                                                          |                                                           |                                                                                                                 | 2.00            |
| [10]CPP                                                                                                       | 1.485                                                   | 1.400                                                    | 1.387                                                     | 30.66                                                                                                           | 1.86            |
| [5]CPP                                                                                                        | 1.431                                                   | 1.430                                                    | 1.365                                                     | 0.04                                                                                                            | 0.14            |
| [10]CPP $\supset$ [5]CPP <sup>2+</sup> (2)                                                                    |                                                         |                                                          |                                                           |                                                                                                                 | 2.00            |
| [10]CPP                                                                                                       | 1.486                                                   | 1.401                                                    | 1.388                                                     | 25.50                                                                                                           | 1.75            |
| [5]CPP                                                                                                        | 1.431                                                   | 1.429                                                    | 1.366                                                     | 0.01                                                                                                            | 0.25            |
| [10]CPP $\supset$ [5]CPP <sup>2+</sup> (3)                                                                    |                                                         |                                                          |                                                           |                                                                                                                 | 2.00            |
| [10]CPP                                                                                                       | 1.485                                                   | 1.400                                                    | 1.389                                                     | 32.44                                                                                                           | 1.71            |
| [5]CPP                                                                                                        | 1.431                                                   | 1.430                                                    | 1.366                                                     | 1.42                                                                                                            | 0.25            |
| Free [10]CPP                                                                                                  | 1.486                                                   | 1.400                                                    | 1.388                                                     | 36.86                                                                                                           |                 |
| Free [5]CPP <sup>2+</sup>                                                                                     | 1.432                                                   | 1.431                                                    | 1.366                                                     | 0.11                                                                                                            |                 |
| [10]CPP $\supset$ [5]CPP <sup>2+</sup><br>B(C <sub>6</sub> F <sub>5</sub> ) <sub>4</sub> <sub>2</sub> (X-ray) |                                                         |                                                          |                                                           |                                                                                                                 |                 |
| [10]CPP                                                                                                       | 1.486(4)                                                | 1.399(4)                                                 | 1.381(4)                                                  | 17.6(4)                                                                                                         |                 |
| [5]CPP                                                                                                        | 1.425(6)                                                | 1.429(4)                                                 | 1.355(4)                                                  | 1.08(4)                                                                                                         |                 |

### 3. X-ray crystallographic structures

A suitable single crystal was obtained by vapor diffusion of hexane into a sample solution in dichloroethane or dichloromethane. The intensity data were collected at 103 K on Rigaku Saturn70 CCD diffractometer with the VariMax Optix using Mo K $\alpha$  radiation ( $\lambda = 0.71073 \text{ \AA}$ ). The intensity data were corrected for Lorentz and polarization effects and for absorption (multiscan). The structures were solved by direct methods (SHELXT 2014/5) and refined by least-squares calculations on  $F^2$  for all reflections (SHELXL-2019/3) [4]. The non-hydrogen atoms were refined anisotropically. Hydrogen atoms were placed using AFIX instructions. All calculations were performed by using Yadokari-XG [5] and Olex-2 1.5 [6]. The crystallographic data and the summary of solution and refinement are given in Table S4.

**Table S4.** Crystal data and structure refinement parameters of  $([10]\text{CPP}\supset[5]\text{CPP}^{2+}[\text{B}(\text{C}_6\text{F}_5)_4]_2)$ .

| Identification code  |                                                                                                                                                                              | Identification code                    |                                                                        |
|----------------------|------------------------------------------------------------------------------------------------------------------------------------------------------------------------------|----------------------------------------|------------------------------------------------------------------------|
| Data deposition      | CCDC 2314282                                                                                                                                                                 | Density (calculated)                   | 1.612 g/m <sup>3</sup>                                                 |
| Empirical formula    | C <sub>60</sub> H <sub>40</sub> , (C <sub>24</sub> BF <sub>20</sub> ) <sub>2</sub> , C <sub>30</sub><br>H <sub>20</sub> , (CH <sub>2</sub> Cl <sub>2</sub> ) <sub>4.33</sub> | Absorption coefficient $\mu$           | 0.326 mm <sup>-1</sup>                                                 |
| Formula weight       | 2867.21                                                                                                                                                                      | $F(000)$                               | 11519                                                                  |
| Temperature          | 103(2) K                                                                                                                                                                     | Crystal size                           | 0.04, 0.10, 0.15 $\text{\AA}$                                          |
| Wavelength           | 0.71073 $\text{\AA}$                                                                                                                                                         | $\theta$ range for data collection     | 1.6440 to 28.8400°                                                     |
| Crystal system       | monoclinic                                                                                                                                                                   | Index ranges                           | -36 $\leq h \leq$ 36,<br>-27 $\leq k \leq$ 27,<br>-55 $\leq l \leq$ 55 |
| Space group          | C2/c                                                                                                                                                                         | Reflection collected                   | 1777842                                                                |
| Unit cell dimensions | $a = 28.4017(4) \text{ \AA}$<br>$b = 20.3156(3) \text{ \AA}$<br>$c = 41.3026(8) \text{ \AA}$<br>$\alpha = 90^\circ$<br>$\beta = 97.433(2)^\circ$<br>$\gamma = 90^\circ$      | Data/restraints/parameters             | 28748/0/1913                                                           |
| Volume               | 23631.2(7) $\text{\AA}^3$                                                                                                                                                    | Goodness-of-fit on $F^2$               | 1.027                                                                  |
| Z                    | 8                                                                                                                                                                            | Final $R$ indices [ $I > 2\sigma(I)$ ] | $R_1 = 0.0575$ , $wR_2 = 0.1120$                                       |
|                      |                                                                                                                                                                              | $R$ indices (all data)                 | $R_1 = 0.1053$ , $wR_2 = 0.1288$                                       |

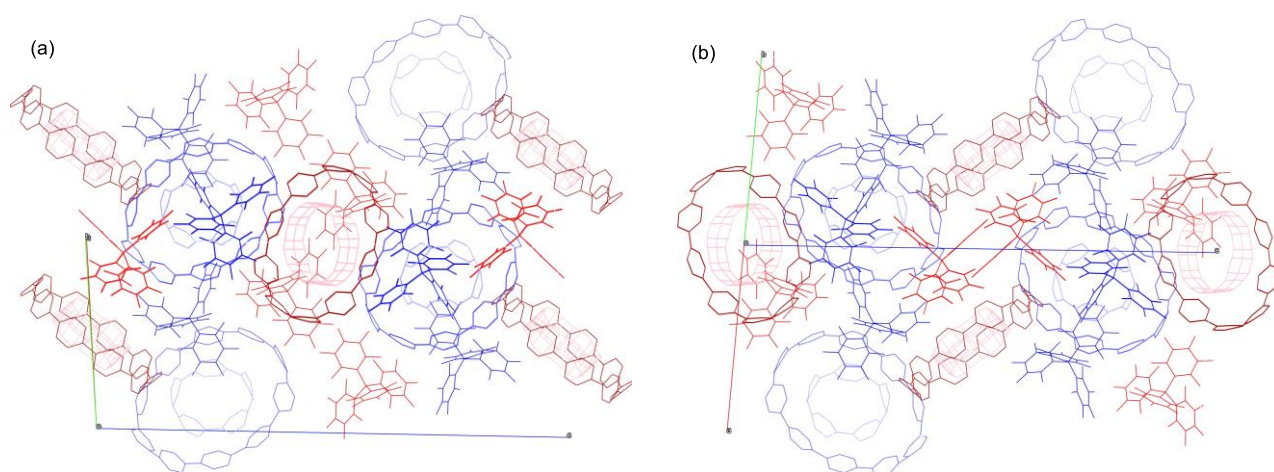

**Figure S3.** Wire-frame view of packing structure of crystalline unit lattices viewed from a) 45° and b) 135° directions of the  $a$ ,  $b$ -axes.

Cartesian Coordination  
[5]CPP<sup>2+</sup>

|          |        |        |        |
|----------|--------|--------|--------|
| C        | 3.099  | 1.563  | 1.210  |
| C        | 2.256  | 2.637  | 1.210  |
| C        | 1.611  | 3.043  | -0.001 |
| C        | 2.252  | 2.634  | -1.213 |
| C        | 3.095  | 1.559  | -1.213 |
| C        | 3.339  | 0.839  | -0.001 |
| C        | 0.234  | 3.435  | 0.000  |
| C        | -0.527 | 3.426  | 1.212  |
| C        | -0.529 | 3.429  | -1.211 |
| C        | -1.809 | 2.957  | 1.212  |
| C        | -1.811 | 2.959  | -1.210 |
| C        | -2.396 | 2.472  | 0.001  |
| C        | -3.195 | 1.284  | 0.001  |
| C        | -3.423 | 0.557  | 1.212  |
| C        | -3.423 | 0.558  | -1.211 |
| C        | -3.373 | -0.808 | 1.211  |
| C        | -3.373 | -0.807 | -1.212 |
| C        | -3.092 | -1.515 | -0.001 |
| C        | -2.208 | -2.642 | -0.001 |
| C        | -1.587 | -3.082 | -1.212 |
| C        | -1.589 | -3.084 | 1.210  |
| C        | -0.273 | -3.456 | -1.212 |
| C        | -0.275 | -3.458 | 1.211  |
| C        | 0.486  | -3.408 | 0.000  |
| C        | 3.392  | -0.591 | 0.001  |
| C        | 3.205  | -1.331 | -1.210 |
| C        | 3.202  | -1.328 | 1.213  |
| C        | 2.444  | -2.464 | -1.210 |
| C        | 2.440  | -2.461 | 1.213  |
| C        | 1.830  | -2.916 | 0.001  |
| H        | -3.511 | 1.078  | -2.158 |
| H        | -3.422 | -1.334 | 2.158  |
| H        | -3.423 | -1.331 | -2.159 |
| H        | -2.108 | -3.004 | -2.160 |
| H        | -2.111 | -3.009 | 2.157  |
| H        | 3.478  | 1.195  | 2.157  |
| H        | 1.989  | 3.093  | 2.157  |
| H        | 1.982  | 3.086  | -2.160 |
| H        | 3.470  | 1.189  | -2.160 |
| H        | -0.059 | 3.669  | 2.159  |
| H        | -0.062 | 3.674  | -2.158 |
| H        | -2.323 | 2.841  | 2.160  |
| H        | -2.327 | 2.845  | -2.157 |
| H        | -3.511 | 1.076  | 2.159  |
| H        | 0.211  | -3.664 | -2.159 |
| H        | 0.208  | -3.669 | 2.158  |
| H        | 3.556  | -0.936 | -2.157 |
| H        | 3.548  | -0.931 | 2.160  |
| H        | 2.211  | -2.938 | -2.157 |
| H        | 2.204  | -2.932 | 2.160  |
| <b>1</b> |        |        |        |
| C        | 1.960  | 2.836  | 0.674  |
| C        | 1.296  | 3.198  | 1.888  |
| C        | -0.045 | 3.449  | 1.889  |
| C        | -0.797 | 3.353  | 0.676  |
| C        | -0.040 | 3.491  | -0.529 |
| C        | 1.303  | 3.239  | -0.530 |
| C        | -2.090 | 2.740  | 0.676  |
| C        | -2.677 | 2.240  | -0.528 |
| C        | -3.331 | 1.040  | -0.528 |
| C        | -3.435 | 0.277  | 0.676  |
| C        | -3.293 | 1.021  | 1.889  |
| C        | -2.640 | 2.218  | 1.890  |

|   |        |        |        |
|---|--------|--------|--------|
| C | -3.251 | -1.142 | 0.676  |
| C | -2.925 | -1.826 | 1.889  |
| C | -1.988 | -2.818 | 1.888  |
| C | -1.324 | -3.182 | 0.674  |
| C | -2.019 | -2.848 | -0.530 |
| C | -2.957 | -1.854 | -0.529 |
| C | 0.082  | -3.446 | 0.673  |
| C | 0.849  | -3.385 | -0.532 |
| C | 2.084  | -2.799 | -0.533 |
| C | 2.617  | -2.244 | 0.671  |
| C | 2.067  | -2.765 | 1.884  |
| C | 0.835  | -3.349 | 1.885  |
| C | 3.444  | -0.243 | 1.884  |
| C | 3.268  | 1.110  | 1.885  |
| C | 2.943  | 1.796  | 0.673  |
| C | 3.307  | 1.118  | -0.532 |
| C | 3.482  | -0.238 | -0.533 |
| C | 3.303  | -0.987 | 0.671  |
| H | 1.819  | 3.154  | 2.836  |
| H | -0.547 | 3.597  | 2.838  |
| H | -0.547 | 3.678  | -1.468 |
| H | 1.841  | 3.230  | -1.470 |
| H | -2.502 | 2.750  | -1.468 |
| H | -3.666 | 0.618  | -1.468 |
| H | -3.589 | 0.588  | 2.838  |
| H | -2.436 | 2.701  | 2.838  |
| H | -3.320 | -1.483 | 2.838  |
| H | -1.668 | -3.234 | 2.836  |
| H | -1.720 | -3.295 | -1.470 |
| H | -3.386 | -1.528 | -1.469 |
| H | 0.406  | -3.692 | -1.472 |
| H | 2.601  | -2.652 | -1.474 |
| H | 2.562  | -2.590 | 2.832  |
| H | 0.387  | -3.621 | 2.834  |
| H | 3.563  | -0.754 | 2.833  |
| H | 3.254  | 1.633  | 2.834  |
| H | 3.328  | 1.657  | -1.472 |
| H | 3.638  | -0.752 | -1.474 |
| C | -6.619 | 2.822  | -1.437 |
| C | -5.954 | 4.039  | -1.437 |
| C | -5.269 | 4.485  | -0.297 |
| C | -5.459 | 3.768  | 0.888  |
| C | -6.125 | 2.551  | 0.888  |
| C | -6.625 | 2.005  | -0.298 |
| C | -4.168 | 5.477  | -0.379 |
| C | -3.713 | 6.206  | 0.728  |
| C | -3.380 | 5.509  | -1.537 |
| C | -2.457 | 6.801  | 0.728  |
| C | -2.128 | 6.102  | -1.537 |
| C | -1.606 | 6.692  | -0.379 |
| C | -6.864 | 0.542  | -0.380 |
| C | -6.466 | -0.138 | -1.538 |
| C | -7.230 | -0.234 | 0.727  |
| C | -6.288 | -1.512 | -1.538 |
| C | -7.052 | -1.613 | 0.727  |
| C | -6.501 | -2.271 | -0.380 |
| C | -5.898 | -3.625 | -0.297 |
| C | -5.684 | -4.414 | -1.436 |
| C | -5.275 | -4.026 | 0.889  |
| C | -4.731 | -5.422 | -1.436 |
| C | -4.321 | -5.033 | 0.889  |
| C | -3.955 | -5.678 | -0.296 |
| C | -0.141 | 6.917  | -0.297 |
| C | 0.639  | 7.165  | -1.436 |
| C | 0.535  | 6.610  | 0.888  |
| C | 2.001  | 6.908  | -1.437 |

|   |        |        |        |          |        |        |        |
|---|--------|--------|--------|----------|--------|--------|--------|
| C | 1.898  | 6.354  | 0.888  | H        | 7.518  | -0.260 | -2.348 |
| C | 2.638  | 6.395  | -0.297 | H        | 6.441  | -0.394 | 1.804  |
| C | 3.922  | 5.654  | -0.380 | H        | 7.201  | -2.537 | 1.616  |
| C | 4.755  | 5.447  | 0.727  | H        | 5.932  | -1.851 | -2.427 |
| C | 4.195  | 4.914  | -1.537 | H        | 6.028  | -4.684 | 1.616  |
| C | 5.710  | 4.437  | 0.728  | H        | 4.766  | -3.985 | -2.428 |
| C | 5.148  | 3.907  | -1.537 |          |        |        |        |
| C | 5.870  | 3.594  | -0.379 | <b>2</b> |        |        |        |
| C | -2.637 | -6.356 | -0.378 | C        | -1.904 | -3.121 | -0.552 |
| C | -2.011 | -6.943 | 0.729  | C        | -3.160 | 0.678  | 2.086  |
| C | -1.868 | -6.188 | -1.536 | C        | -3.064 | 1.395  | 0.851  |
| C | -0.645 | -7.198 | 0.729  | C        | -1.295 | -2.863 | 1.775  |
| C | -0.505 | -6.442 | -1.536 | C        | -3.483 | -0.688 | -0.311 |
| C | 0.151  | -6.877 | -0.378 | C        | -2.200 | -2.542 | 0.719  |
| C | 1.625  | -6.722 | -0.296 | C        | 0.401  | -3.415 | 0.134  |
| C | 2.441  | -6.765 | -1.435 | C        | -0.026 | -3.284 | 1.489  |
| C | 2.199  | -6.253 | 0.889  | C        | -0.642 | -3.558 | -0.834 |
| C | 3.695  | -6.172 | -1.436 | C        | -3.485 | 0.682  | -0.310 |
| C | 3.453  | -5.660 | 0.889  | C        | -1.911 | 3.118  | -0.550 |
| C | 4.180  | -5.513 | -0.297 | C        | -2.206 | 2.537  | 0.721  |
| C | 6.538  | 2.270  | -0.296 | C        | -1.301 | 2.860  | 1.777  |
| C | 7.015  | 1.606  | -1.435 | C        | -3.158 | -0.686 | 2.085  |
| C | 6.455  | 1.534  | 0.889  | C        | -3.061 | -1.402 | 0.850  |
| C | 7.194  | 0.231  | -1.435 | C        | 3.430  | -1.445 | 0.504  |
| C | 6.634  | 0.158  | 0.889  | C        | 1.957  | 2.557  | -1.578 |
| C | 6.902  | -0.533 | -0.296 | C        | 1.705  | 2.985  | -0.237 |
| C | 6.594  | -1.983 | -0.379 | C        | 2.723  | -1.443 | -1.812 |
| C | 6.653  | -2.839 | 0.728  | C        | 3.426  | 1.451  | 0.505  |
| C | 5.976  | -2.471 | -1.537 | C        | 3.281  | -0.710 | -0.716 |
| C | 5.987  | -4.059 | 0.728  | C        | 1.712  | -2.982 | -0.238 |
| C | 5.312  | -3.687 | -1.537 | C        | 1.963  | -2.553 | -1.579 |
| C | 5.234  | -4.471 | -0.379 | C        | 2.666  | -2.551 | 0.737  |
| H | -7.099 | 2.483  | -2.350 | C        | 2.660  | 2.556  | 0.738  |
| H | -5.927 | 4.627  | -2.350 | C        | -0.033 | 3.284  | 1.491  |
| H | -4.979 | 4.102  | 1.803  | C        | 0.394  | 3.415  | 0.136  |
| H | -6.147 | 1.967  | 1.803  | C        | -0.650 | 3.557  | -0.832 |
| H | -4.335 | 6.284  | 1.615  | C        | 2.720  | 1.449  | -1.811 |
| H | -3.709 | 4.980  | -2.427 | C        | 3.279  | 0.717  | -0.715 |
| H | -2.124 | 7.332  | 1.616  | C        | -5.729 | 3.281  | -1.449 |
| H | -1.511 | 6.022  | -2.427 | C        | -6.376 | 2.824  | -0.294 |
| H | -6.200 | 0.424  | -2.429 | C        | -2.807 | -5.935 | 1.111  |
| H | -7.631 | 0.246  | 1.615  | C        | -3.521 | -5.991 | -0.090 |
| H | -5.889 | -1.988 | -2.429 | C        | -4.934 | 4.418  | -1.421 |
| H | -7.317 | -2.180 | 1.615  | C        | -7.213 | 0.687  | -1.358 |
| H | -6.235 | -4.209 | -2.349 | C        | -1.560 | -6.996 | -1.111 |
| H | -5.445 | -3.466 | 1.804  | C        | -6.596 | 0.687  | 0.956  |
| H | -4.555 | -5.984 | -2.349 | C        | -1.474 | -6.309 | 1.174  |
| H | -3.771 | -5.232 | 1.804  | C        | -5.535 | -4.801 | 0.863  |
| H | 0.167  | 7.516  | -2.349 | C        | -5.723 | -3.292 | -1.448 |
| H | -0.028 | 6.448  | 1.804  | C        | -6.817 | 1.409  | -0.223 |
| H | 2.568  | 7.065  | -2.350 | C        | -0.789 | -6.754 | 0.037  |
| H | 2.364  | 5.999  | 1.803  | C        | -6.594 | -0.699 | 0.956  |
| H | 4.636  | 6.062  | 1.615  | C        | -5.546 | 4.791  | 0.861  |
| H | 3.591  | 5.063  | -2.428 | C        | -4.733 | -5.146 | -0.233 |
| H | 6.317  | 4.285  | 1.616  | C        | -6.339 | -3.669 | 0.833  |
| H | 5.263  | 3.296  | -2.427 | C        | 1.388  | -6.562 | -1.203 |
| H | -2.592 | -7.175 | 1.618  | C        | -4.925 | -4.428 | -1.419 |
| H | -2.321 | -5.762 | -2.428 | C        | -7.211 | -0.701 | -1.358 |
| H | -0.187 | -7.625 | 1.618  | C        | -6.348 | 3.658  | 0.831  |
| H | 0.071  | -6.209 | -2.427 | C        | 1.457  | -6.572 | 1.179  |
| H | 2.074  | -7.225 | -2.348 | C        | -6.370 | -2.836 | -0.293 |
| H | 1.614  | -6.239 | 1.804  | C        | 0.699  | -6.710 | 0.008  |
| H | 4.283  | -6.180 | -2.349 | C        | -3.533 | 5.985  | -0.091 |
| H | 3.814  | -5.199 | 1.803  | C        | -4.744 | 5.137  | -0.234 |
| H | 7.204  | 2.163  | -2.348 | C        | -2.909 | 6.616  | -1.176 |
| H | 6.128  | 2.019  | 1.805  | C        | -2.819 | 5.930  | 1.110  |
| C | -6.814 | -1.422 | -0.222 | H        | -7.487 | -1.230 | -2.265 |
| C | -2.896 | -6.622 | -1.175 | H        | -6.923 | 3.394  | 1.714  |

|   |        |        |        |          |        |        |        |
|---|--------|--------|--------|----------|--------|--------|--------|
| C | 2.758  | 6.129  | 1.142  | H        | 1.010  | -6.771 | 2.147  |
| C | 3.399  | 5.833  | -0.068 | H        | -3.458 | 6.776  | -2.100 |
| C | 5.800  | -3.141 | -1.162 | H        | -3.273 | 5.477  | 1.987  |
| C | 6.434  | -2.789 | 0.036  | H        | -3.445 | -6.783 | -2.099 |
| C | 1.443  | 6.574  | 1.179  | H        | 3.265  | 5.956  | 2.086  |
| C | 5.408  | 4.758  | 1.050  | H        | 5.901  | -2.500 | -2.033 |
| C | 5.417  | -4.747 | 1.050  | H        | 0.996  | 6.771  | 2.148  |
| C | 4.919  | 4.224  | -1.225 | H        | 5.306  | 5.395  | 1.923  |
| C | 4.928  | -4.214 | -1.226 | H        | 5.317  | -5.385 | 1.922  |
| C | 7.432  | -0.686 | -0.934 | H        | 4.376  | 4.381  | -2.151 |
| C | 6.707  | 0.701  | 1.346  | H        | 4.386  | -4.373 | -2.151 |
| C | 4.631  | 4.997  | -0.095 | H        | 7.750  | -1.215 | -1.829 |
| C | 4.641  | -4.988 | -0.096 | H        | 6.399  | 1.227  | 2.246  |
| C | 5.793  | 3.152  | -1.161 | H        | 5.895  | 2.512  | -2.032 |
| C | 1.375  | 6.565  | -1.203 | H        | 0.860  | 6.712  | -2.146 |
| C | 6.959  | -1.407 | 0.170  | H        | 7.747  | 1.230  | -1.828 |
| C | 7.431  | 0.701  | -0.934 | H        | 3.278  | -5.951 | 2.086  |
| C | 2.770  | -6.124 | 1.142  | H        | 6.401  | -1.215 | 2.246  |
| C | 6.709  | -0.688 | 1.346  | H        | 6.832  | 3.504  | 2.038  |
| C | 6.284  | 3.682  | 1.117  | H        | 3.177  | 6.046  | -2.209 |
| C | 2.701  | 6.156  | -1.240 | H        | 3.188  | -6.038 | -2.209 |
| C | 2.713  | -6.150 | -1.240 | H        | -0.957 | 6.139  | 2.104  |
| C | 6.956  | 1.421  | 0.170  | H        | -1.123 | 7.446  | -1.988 |
| C | 3.411  | -5.826 | -0.068 | H        | 6.839  | -3.490 | 2.037  |
| C | -0.803 | 6.752  | 0.037  |          |        |        |        |
| C | 0.685  | 6.711  | 0.008  | <b>3</b> |        |        |        |
| C | -1.488 | 6.306  | 1.173  | C        | 2.579  | 1.550  | -1.312 |
| C | -1.574 | 6.993  | -1.111 | C        | 3.099  | 0.300  | -1.790 |
| C | 6.428  | 2.802  | 0.036  | C        | 3.556  | -0.631 | -0.906 |
| C | 6.291  | -3.669 | 1.116  | C        | 3.496  | -0.359 | 0.499  |
| H | -2.663 | -3.137 | -1.326 | C        | 3.497  | 1.022  | 0.865  |
| H | -3.122 | 1.207  | 3.032  | C        | 3.040  | 1.956  | -0.020 |
| H | -1.543 | -2.628 | 2.803  | C        | 3.025  | -1.359 | 1.411  |
| H | -3.655 | -1.216 | -1.241 | C        | 2.574  | -0.997 | 2.716  |
| H | 0.691  | -3.373 | 2.297  | C        | 1.455  | -1.581 | 3.244  |
| H | -0.416 | -3.919 | -1.830 | C        | 0.729  | -2.549 | 2.488  |
| H | -3.658 | 1.210  | -1.240 | C        | 1.450  | -3.197 | 1.444  |
| H | -2.671 | 3.133  | -1.323 | C        | 2.573  | -2.618 | 0.920  |
| H | -1.548 | 2.623  | 2.805  | C        | -0.712 | -2.553 | 2.487  |
| H | -3.120 | -1.215 | 3.031  | C        | -1.429 | -3.206 | 1.445  |
| H | 4.070  | -1.063 | 1.291  | C        | -2.556 | -2.634 | 0.920  |
| H | 1.428  | 3.015  | -2.405 | C        | -3.015 | -1.378 | 1.410  |
| H | 2.784  | -1.054 | -2.822 | C        | -2.565 | -1.011 | 2.714  |
| H | 4.067  | 1.071  | 1.291  | C        | -1.443 | -1.589 | 3.242  |
| H | 1.435  | -3.012 | -2.407 | C        | -3.493 | -0.381 | 0.498  |
| H | 2.716  | -3.038 | 1.703  | C        | -3.504 | 1.000  | 0.863  |
| H | 2.710  | 3.042  | 1.705  | C        | -3.054 | 1.937  | -0.022 |
| H | 0.684  | 3.374  | 2.299  | C        | -2.589 | 1.533  | -1.313 |
| H | -0.425 | 3.919  | -1.828 | C        | -3.100 | 0.280  | -1.791 |
| H | 2.781  | 1.061  | -2.821 | C        | -3.551 | -0.654 | -0.907 |
| H | -5.764 | 2.688  | -2.359 | C        | -0.685 | 1.439  | -2.902 |
| H | -3.261 | -5.483 | 1.988  | C        | 0.677  | 1.444  | -2.901 |
| H | -4.368 | 4.684  | -2.310 | C        | 1.398  | 2.122  | -1.863 |
| H | -7.490 | 1.214  | -2.266 | C        | 0.672  | 3.150  | -1.173 |
| H | -1.108 | -7.449 | -1.988 | C        | -0.693 | 3.146  | -1.174 |
| H | -6.308 | 1.210  | 1.863  | C        | -1.411 | 2.113  | -1.864 |
| H | -0.944 | -6.141 | 2.104  | H        | 3.026  | 0.038  | -2.840 |
| H | -5.497 | -5.397 | 1.771  | H        | 3.851  | -1.614 | -1.256 |
| H | -5.759 | -2.700 | -2.358 | H        | 3.716  | 1.327  | 1.881  |
| H | -6.305 | -1.221 | 1.863  | H        | 2.909  | 2.979  | 0.318  |
| H | -5.509 | 5.387  | 1.768  | H        | 3.030  | -0.169 | 3.246  |
| H | -6.914 | -3.406 | 1.716  | H        | 1.061  | -1.200 | 4.179  |
| H | 0.873  | -6.710 | -2.147 | H        | 1.050  | -4.079 | 0.956  |
| H | -4.360 | -4.693 | -2.308 | H        | 3.021  | -3.067 | 0.040  |
| H | -1.024 | -4.086 | 0.957  | C        | -2.847 | 6.302  | 0.251  |
| H | -3.001 | -3.087 | 0.041  | C        | -0.720 | 6.568  | -1.004 |
| H | -3.026 | -0.186 | 3.244  | C        | -1.440 | 6.771  | 0.179  |
| H | -1.050 | -1.205 | 4.177  | C        | -3.705 | 6.313  | -0.857 |



|   |        |        |        |   |        |        |        |
|---|--------|--------|--------|---|--------|--------|--------|
| H | -3.726 | 1.304  | 1.879  | C | -3.265 | 5.593  | 1.384  |
| H | -2.930 | 2.960  | 0.316  | C | -4.839 | 5.511  | -0.892 |
| H | -3.025 | 0.017  | -2.841 | C | -4.403 | 4.798  | 1.351  |
| H | -3.839 | -1.640 | -1.257 | C | -5.160 | 4.669  | 0.180  |
| H | -1.206 | 0.816  | -3.620 | H | 3.505  | -6.839 | 1.464  |
| H | 1.202  | 0.824  | -3.619 | H | 5.495  | -5.419 | 1.518  |
| H | 1.192  | 3.879  | -0.560 | H | 4.566  | -3.979 | -2.421 |
| H | -1.218 | 3.872  | -0.561 | H | 2.573  | -5.372 | -2.464 |
| C | 3.722  | -6.204 | 0.610  | H | 6.740  | -3.258 | -2.314 |
| C | 4.856  | -5.399 | 0.640  | H | 5.648  | -3.130 | 1.837  |
| C | 5.153  | -4.529 | -0.418 | H | 7.484  | -0.932 | -2.186 |
| C | 4.356  | -4.617 | -1.567 | H | 6.387  | -0.814 | 1.962  |
| C | 3.221  | -5.415 | -1.593 | H | 1.244  | -6.388 | 1.721  |
| C | 2.839  | -6.170 | -0.477 | H | 1.248  | -7.200 | -2.494 |
| C | 6.046  | -3.351 | -0.270 | H | -1.197 | -6.396 | 1.720  |
| C | 6.644  | -2.723 | -1.373 | H | -1.194 | -7.209 | -2.494 |
| C | 6.073  | -2.668 | 0.950  | H | -3.454 | -6.865 | 1.463  |
| C | 7.066  | -1.402 | -1.301 | H | -2.532 | -5.390 | -2.464 |
| C | 6.494  | -1.346 | 1.021  | H | -5.455 | -5.459 | 1.516  |
| C | 6.904  | -0.655 | -0.125 | H | -4.535 | -4.011 | -2.421 |
| C | 1.441  | -6.671 | -0.410 | H | 7.547  | 1.140  | 1.902  |
| C | 0.720  | -6.573 | 0.787  | H | 6.236  | 0.947  | -2.183 |
| C | 0.720  | -6.998 | -1.567 | H | 6.789  | 3.463  | 2.031  |
| C | -0.671 | -6.578 | 0.786  | H | 5.480  | 3.255  | -2.052 |
| C | -0.667 | -7.003 | -1.567 | H | 5.413  | 5.544  | -1.788 |
| C | -1.391 | -6.681 | -0.411 | H | 4.607  | 4.217  | 2.215  |
| C | -2.792 | -6.190 | -0.478 | H | 3.407  | 6.946  | -1.724 |
| C | -3.676 | -6.231 | 0.609  | H | 2.599  | 5.601  | 2.272  |
| C | -3.179 | -5.438 | -1.594 | H | -6.714 | -3.306 | -2.315 |
| C | -4.815 | -5.434 | 0.639  | H | -5.623 | -3.170 | 1.836  |
| C | -4.320 | -4.648 | -1.568 | H | -7.476 | -0.986 | -2.187 |
| C | -5.118 | -4.566 | -0.419 | H | -6.380 | -0.861 | 1.962  |
| C | 6.877  | 0.830  | -0.128 | H | -7.556 | 1.084  | 1.902  |
| C | 7.079  | 1.592  | 1.032  | H | -6.243 | 0.903  | -2.183 |
| C | 6.389  | 1.494  | -1.258 | H | -6.816 | 3.413  | 2.032  |
| C | 6.653  | 2.913  | 1.105  | H | -5.505 | 3.217  | -2.051 |
| C | 5.959  | 2.811  | -1.184 | H | 1.197  | 7.435  | 2.226  |
| C | 6.003  | 3.520  | 0.022  | H | 1.193  | 6.300  | -1.916 |
| C | 5.124  | 4.706  | 0.179  | H | -1.252 | 7.426  | 2.227  |
| C | 4.796  | 5.545  | -0.894 | H | -1.243 | 6.292  | -1.915 |
| C | 4.366  | 4.830  | 1.350  | H | -3.461 | 6.924  | -1.722 |
| C | 3.656  | 6.338  | -0.859 | H | -2.641 | 5.582  | 2.274  |
| C | 3.222  | 5.616  | 1.383  | H | -5.456 | 5.506  | -1.786 |
| C | 2.799  | 6.321  | 0.249  | H | -4.640 | 4.184  | 2.216  |
| C | -6.020 | -3.394 | -0.271 |   |        |        |        |
| C | -6.623 | -2.770 | -1.374 |   |        |        |        |
| C | -6.052 | -2.711 | 0.949  |   |        |        |        |
| C | -7.054 | -1.453 | -1.302 |   |        |        |        |
| C | -6.482 | -1.393 | 1.020  |   |        |        |        |
| C | -6.898 | -0.705 | -0.125 |   |        |        |        |
| C | -6.883 | 0.780  | -0.128 |   |        |        |        |
| C | -7.091 | 1.541  | 1.032  |   |        |        |        |
| C | -6.399 | 1.448  | -1.257 |   |        |        |        |
| C | -6.675 | 2.864  | 1.106  |   |        |        |        |
| C | -5.980 | 2.769  | -1.183 |   |        |        |        |
| C | -6.030 | 3.476  | 0.023  |   |        |        |        |
| C | 1.388  | 6.780  | 0.178  |   |        |        |        |
| C | 0.667  | 7.170  | 1.315  |   |        |        |        |
| C | 0.669  | 6.573  | -1.004 |   |        |        |        |
| C | -0.721 | 7.165  | 1.316  |   |        |        |        |

## References

1. Patel, V. K.; Kayahara, E.; Yamago, S. *Chem. Eur. J.* **2015**, *21* (15), 5742-5749.
2. Kayahara, E.; Kouyama, T.; Kato, T.; Yamago, S. *J. Am. Chem. Soc.* **2016**, *138* (1), 338-344.
3. Frisch, M. J.; Trucks, G. W.; Schlegel, H. B.; Scuseria, G. E.; Robb, M. A.; Cheeseman, J. R.; Scalmani, G.; Barone, V.; Petersson, G. A.; Nakatsuji, H.; Li, X.; Caricato, M.; Marenich, H. P.; Bloino, J.; Janesko, B. G.; Comperts, R.; Mennucci, B.; Hratchian, H. P.; Ortiz, J. V.; Izmaylov, A. F.; Sonnenberg, J. L.; Williams-Young, D.; Ding, F.; Lipparini, F.; Egidi, F.; Goings, J.; Peng, B.; Petrone, A.; Henderson, T.; Ranasinghe, D.; Zakrzewski, V. G.; Gao, J.; Rega, N.; Zheng, G.; Liang, W.; Hada, M.; Ehara, M.; Toyota, K.; Fukuda, R.; Hasegawa, J.; Ishida, M.; Nakajima, T.; Honda, Y.; Kitao, O.; Nakai, H.; Vreven, T.; Throssell, K.; Montgomery, J., J. A.; Peralta, J. E.; Ogliaro, F.; Bearpark, M. J.; Heyd, J. J.; Brothers, E. N.; Kudin, K. N.; Staroverov, V. N.; Keith, T. A.; Kobayashi, R.; Normand, J.; Raghavachari, K.; Rendell, A. P.; Burant, J. C.; Iyengar, S. S.; Tomasi, J.; Cossi, M.; Millam, J. M.; Klene, M.; Adamo, C.; Cammi, R.; Ochterski, J. W.; Martin, R. L.; Morokuma, K.; Farkas, O.; Foresman, J. B.; Fox, D. J. *Gaussian 16, Revision A.03*; Gaussian Inc: Wallingford CT, 2016.
4. Sheldrick, G. M. *Acta Cryst.* **2015**, *A71*, 3-8.
5. Kabuto, C.; Akine, S.; Kwon, E. *J. Cryst. Soc. Jpn.* **2009**, *51* (3), 218-224.
6. Dolomanov, O. V.; Bourhis, L. J.; Gildea, R. J.; Howard, J. A. K.; Puschmann, H. *J. Appl. Cryst.* **2009**, *42* (2), 339-341.
